# Supplementary material for: Why barcode? High-throughput multiplex sequencing of mitochondrial genomes for molecular systematics
Source: PubMed Central journal article supplement — Nucleic Acids Res. 2010 Sep 28;38(21):e197. doi: 10.1093/nar/gkq807 (PMC2995086; doi:10.1093/nar/gkq807), 2010-09-28

**Why barcode? High-throughput multiplex sequencing of  
mitochondrial genomes for molecular systematics**

Timmermans, M.J.T.N., Dodsworth, S., Culverwell, C.L., Bocak, L., Ahrens, D.,  
Littlewood, D.T.J., Pons, J., and Vogler A.P.

**Supplementary Material**

**Supplementary Table 1. Primers for PCR**

|                         | Primer                   | Locus                      | Primer Sequence 5'=>3'                             | Anneal Temp. (°C)                            | Length (kbp) | PCR † |
|-------------------------|--------------------------|----------------------------|----------------------------------------------------|----------------------------------------------|--------------|-------|
| <b>Sanger Sequences</b> | SPatR<br>Jerry           | <i>cox1</i><br><i>cox1</i> | GCACTAWTCTGCCATATTAGA<br>CAACATTTATTTTGATTTTTGG    | 53                                           | 0.9          | (1)   |
|                         | SPatR<br>SJerry_F        | <i>cox1</i><br><i>cox1</i> | GCACTAWTCTGCCATATTAGA<br>CAACATYTATTYTGATTYTTGG    | 51                                           | 0.9          | (1)   |
|                         | Sytb_F<br>Sytb_R         | <i>cob</i><br><i>cob</i>   | TGAGGNCAAATATCHTTYTGAGG<br>GCAAATARRAARTATCATTCDGG | 55                                           | 0.5          | (1)   |
|                         | SteveND5_F<br>SteveND5_R | <i>nad5</i><br><i>nad5</i> | CCYATAWANCGAATATCYTG<br>GTWTCWTATTGTTTRGTYATTTATT  | 49                                           | 0.6          | (1)   |
|                         | <b>454 Sequences</b>     | 16stev_R2<br>SPatF         | <i>rrnL</i><br><i>cox1</i>                         | ACCTTAGGGATAACAGCGT<br>TCTAATATGGCAGAWTAGTGC | 53           | 10    |
| 16stev_R2<br>SJerry_F   |                          | <i>rrnL</i><br><i>cox1</i> | ACCTTAGGGATAACAGCGT<br>CAACATYTATTYTGATTYTTGG      | 53                                           | 10           | (2)   |
| sCOII_R<br>SJerry_F     |                          | <i>cox2</i><br><i>cox1</i> | CARATTTCDGARCATTG<br>CAACATYTATTYTGATTYTTGG        | 49                                           | 2            | (3)   |
| stRNAM_F<br>SPatR       |                          | <i>tRNA</i><br><i>cox1</i> | AAGCTWNTRGGTTCATACC<br>GCACTAWTCTGCCATATTAGA       | 48                                           | 2            | (3)   |
| ND1A<br>12stevEND_R     |                          | <i>rrnL</i><br><i>rrnS</i> | GGTCCCTTACGAATTTGAATATATCCT<br>GTGCCAGCARTTGCGGTT  | 59                                           | 2            | (3)   |

† PCR conditions provided in Supplementary Table 2

**Supplementary Table 2. PCR conditions**

|                 | (1) BIOTAQ™ DNA Polymerase |        | (2) TaKaRa LR Taq™ |        | (3) BIOTAQ™ DNA Polymerase |        | No. of Cycles |
|-----------------|----------------------------|--------|--------------------|--------|----------------------------|--------|---------------|
|                 | Temp. (°C)                 | Time   | Temp. (°C)         | Time   | Temp. (°C)                 | Time   |               |
| Initialisation  | 94                         | 2 min  | 94                 | 1 min  | 94                         | 2 min  | 1             |
| Denaturation    | 94                         | 30 sec | 98                 | 5 sec  | 94                         | 30 sec | 35            |
| Annealing       | *                          | 30 sec | 53                 | 30 sec | *                          | 30 sec |               |
| Extension       | 70                         | 1 min  | 60                 | 15 min | 60                         | 2 min  |               |
| Final Extension | 72                         | 10 min | 72                 | 10 min | 72                         | 10 min | 1             |
| Final Hold      | 4                          | ∞      | 4                  | ∞      | 4                          | ∞      |               |

\* Annealing temperature varied between each primer pair [see primer table].

In all protocols the central steps of the PCR were repeated 35 times.

Supplementary Table 3. Results of contig generation in simulated data sets

| Accession number | Species                           | Number simulated reads <sup>1)</sup> | Av. read length (bp) | stdev       | GenBank (bp)   | Assembled (bp) <sup>2)</sup> | Number mis-matches <sup>3)</sup> |
|------------------|-----------------------------------|--------------------------------------|----------------------|-------------|----------------|------------------------------|----------------------------------|
| NC_013580.1      | <i>Acmaeodera sp.</i>             | 1168                                 | 279.3                | 30.4        | 16217          | 16103                        | 0                                |
| NC_013554.1      | <i>Adelium sp.</i>                | 1260                                 | 281.6                | 35.5        | 16449          | 16357                        | 7                                |
| NC_008221.1      | <i>Anoplophora glabripennis</i>   | 1202                                 | 288.1                | 35.1        | 15774          | 15728                        | 21*                              |
| NC_013582.1      | <i>Apatides fortis</i>            | 1185                                 | 276.5                | 30.0        | 16171          | 15696                        | 9**                              |
| NC_012139.1      | <i>Aspidytes niobe</i>            | 1055                                 | 286.4                | 35.8        | 14257          | 14188                        | 9                                |
| NC_011324.1      | <i>Chaetosoma scaritides</i>      | 1170                                 | 288.1                | 37.3        | 15511          | 15452                        | 0                                |
| NC_013576.1      | <i>Chauliognathus opacus</i>      | 1068                                 | 285.3                | 32.3        | 14893          | 14774                        | 1                                |
| NC_012765.1      | <i>Chrysochroa fulgidissima</i>   | 1248                                 | 279.0                | 31.5        | 15592          | 15501                        | 14*                              |
| NC_003372.1      | <i>Crioceris 12-punctata</i>      | 1238                                 | 288.1                | 37.5        | 15880          | 15786                        | 6                                |
| NC_011320.1      | <i>Cyphon sp.</i>                 | 1232                                 | 287.1                | 35.8        | 15919          | 15859                        | 4                                |
| NC_012144.1      | <i>Hydroscapha granulum</i>       | 1162                                 | 290.4                | 36.6        | 15975          | 15907                        | 2                                |
| NC_013578.1      | <i>Lucanus mazama</i>             | 1106                                 | 281.5                | 32.2        | 16261          | 15105                        | 4                                |
| NC_013249.1      | <i>Macrogyrus oblongus</i>        | 1204                                 | 288.1                | 36.4        | 16643          | 16607                        | 4                                |
| NC_013254.1      | <i>Mordella atrata</i>            | 1182                                 | 281.9                | 31.9        | 15540          | 15460                        | 2                                |
| NC_011326.1      | <i>Priasilpha obscura</i>         | 1216                                 | 288.3                | 36.6        | 16603          | 16098                        | 1                                |
| NC_013070.1      | <i>Psacotheta hilaris</i>         | 1265                                 | 288.0                | 34.7        | 15856          | 14885                        | 0                                |
| NC_003970.1      | <i>Pyrocoelia rufa</i>            | 1268                                 | 285.9                | 35.2        | 17739          | 16312                        | 9**                              |
| NC_009964.1      | <i>Pyrophorus divergens</i>       | 1191                                 | 278.9                | 30.9        | 16120          | 16081                        | 2                                |
| NC_010969.1      | <i>Rhagophthalmus lufengensis</i> | 1219                                 | 288.5                | 36.3        | 15982          | 15901                        | 4                                |
| NC_010964.1      | <i>Rhagophthalmus ohbai</i>       | 1243                                 | 288.9                | 36.6        | 15704          | 14625                        | 10                               |
| NC_013252.1      | <i>Rhopaea magnicornis</i>        | 1335                                 | 283.5                | 33.5        | 17522          | 17408                        | 0                                |
| NC_011322.1      | <i>Sphaerius sp.</i>              | 1178                                 | 287.2                | 34.8        | 15121          | 15045                        | 5                                |
| NC_011328.1      | <i>Tetraphalerus bruchi</i>       | 1202                                 | 275.5                | 31.1        | 15689          | 15648                        | 3                                |
| NC_011329.1      | <i>Trachypachus holmbergi</i>     | 1222                                 | 285.7                | 36.1        | 15722          | 15626                        | 25                               |
| NC_003081.2      | <i>Tribolium castaneum</i>        | 1181                                 | 282.3                | 32.3        | 15881          | 15824                        | 1                                |
| <b>Average</b>   | -                                 | <b>1200</b>                          | <b>284.6</b>         | <b>34.2</b> | <b>15960.8</b> | <b>15679.0</b>               | <b>5.7</b>                       |

<sup>1)</sup> Sequences were generated on linearized full mt genome sequences, with mean fragment size 284 (parameter 2: 50). Other settings were default.

<sup>2)</sup> Length of mt genome from MIRA assembly from simulated data set; the difference from the original sequence ('GenBank') was due to missing nucleotides near the ends of the linearized mt genomes only, except for those marked with \*\*\*.

<sup>3)</sup> Number of mismatched nucleotide positions between the GenBank sequence and the simulated MIRA assembly. \*) Assembly produced two (*Anoplophora*) or three (*Chrysochroa*) contigs with partly overlapping sequences that each contain several errors against the GenBank entry in the region overlapping. \*\*) Tandem repeat unit omitted from AT rich region.

**Supplementary Figures S1-S5: Phylogenetic trees obtained from parsimony and model-based analyses.**

**Supplementary Fig. 1 Parsimony**

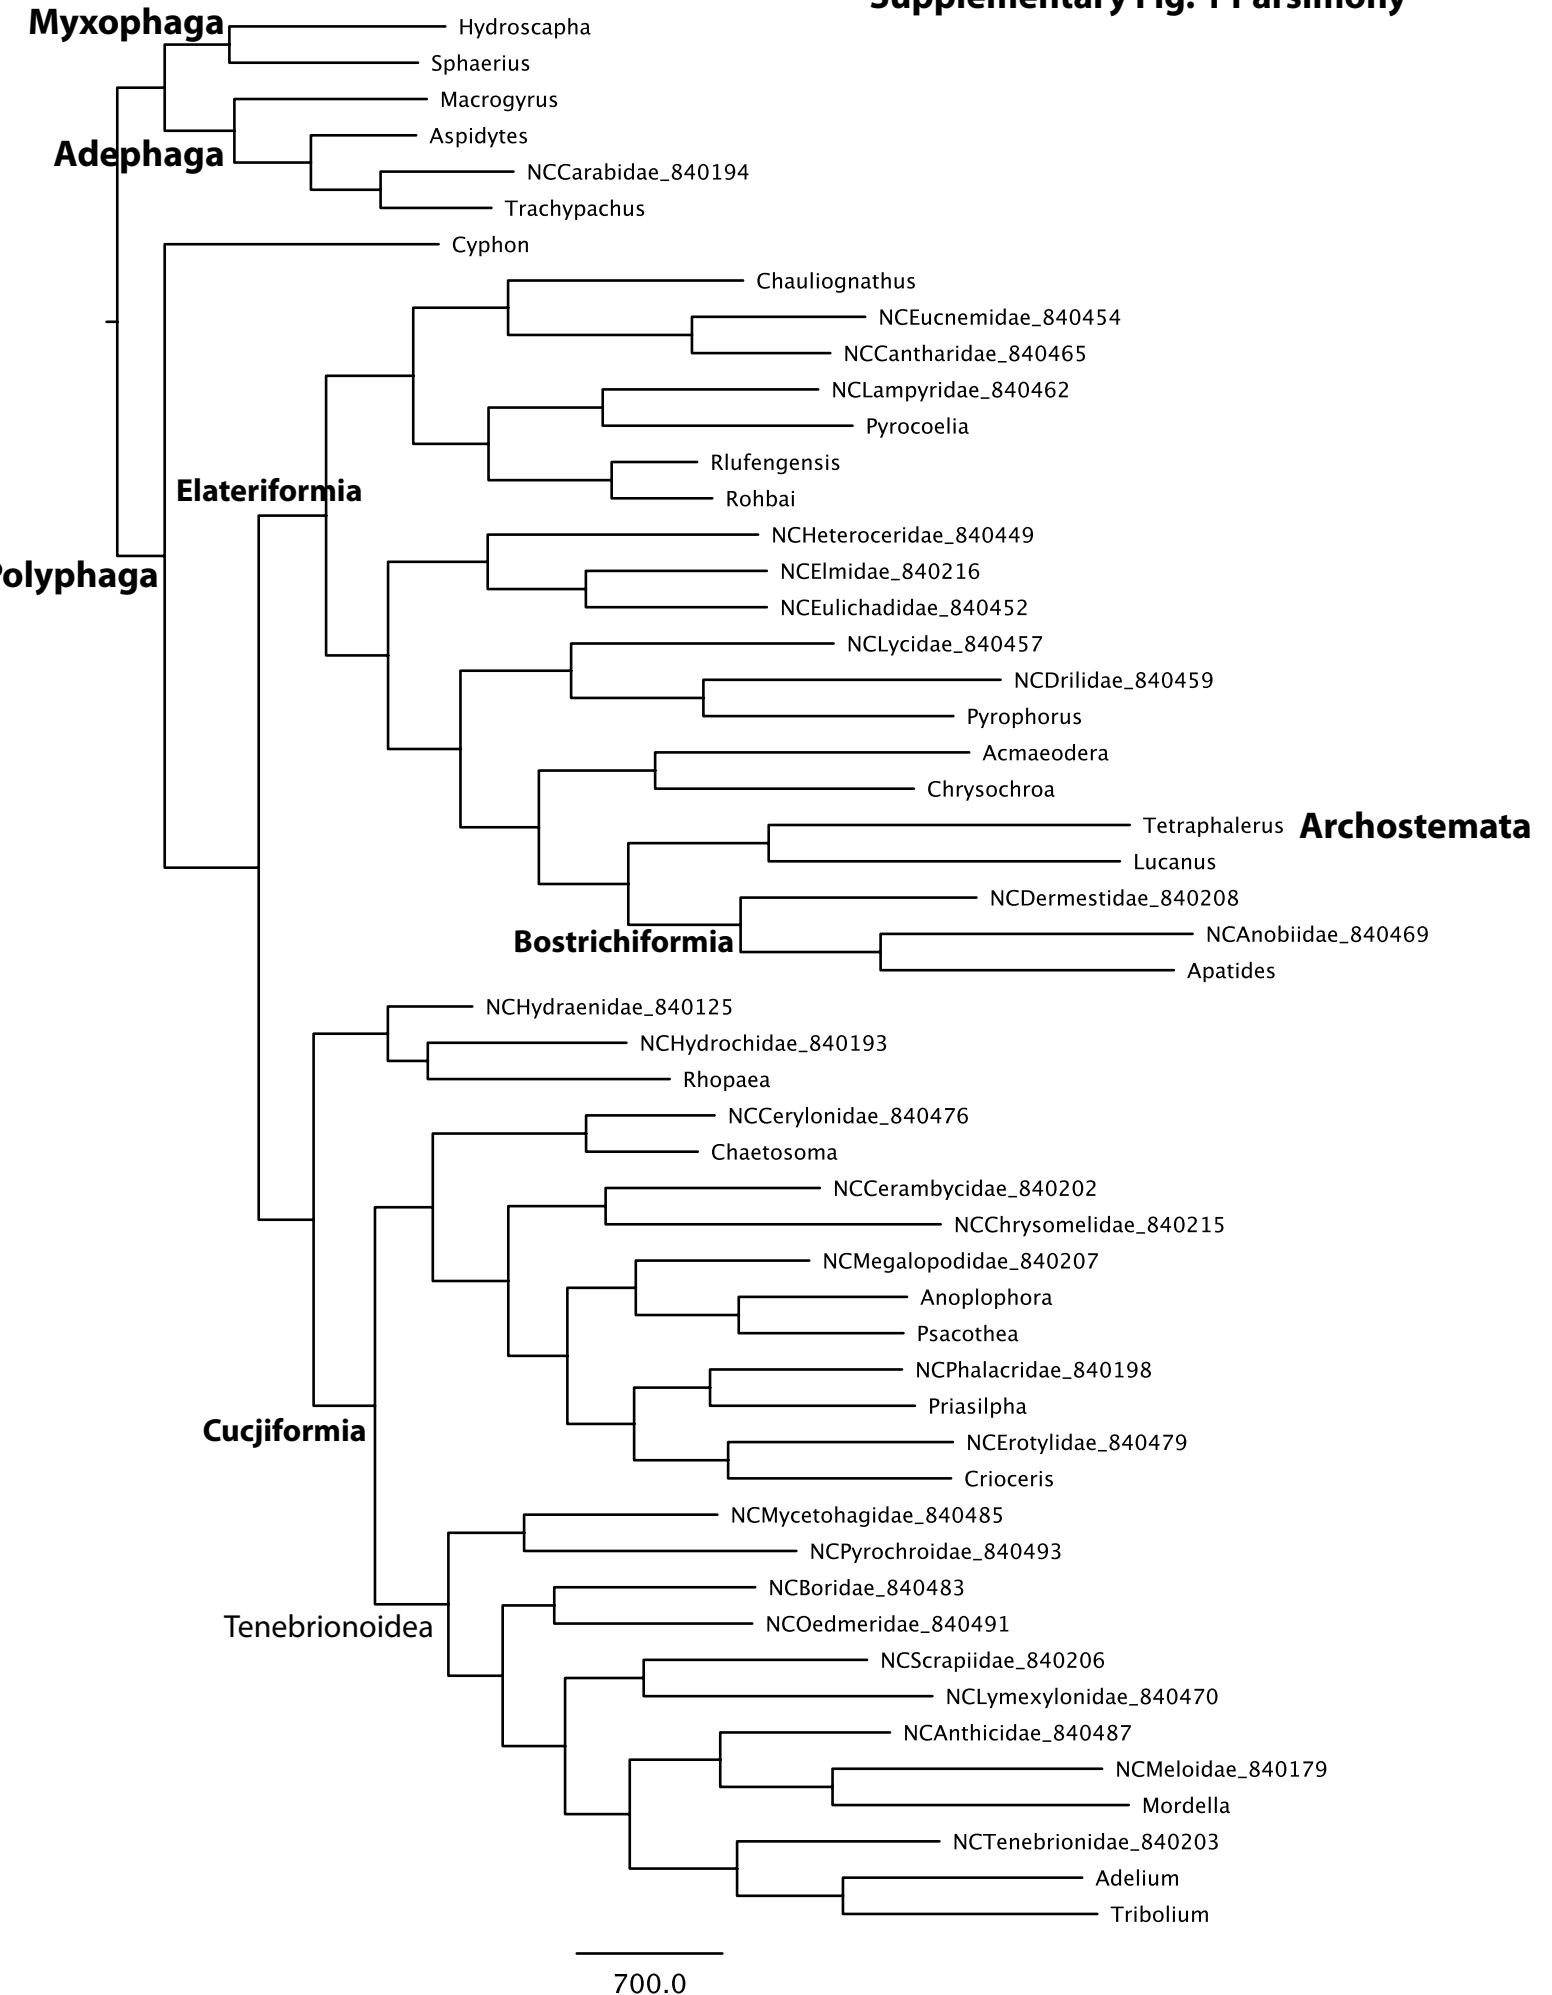

Supplementary Fig. 2 RAxML 1,2,3

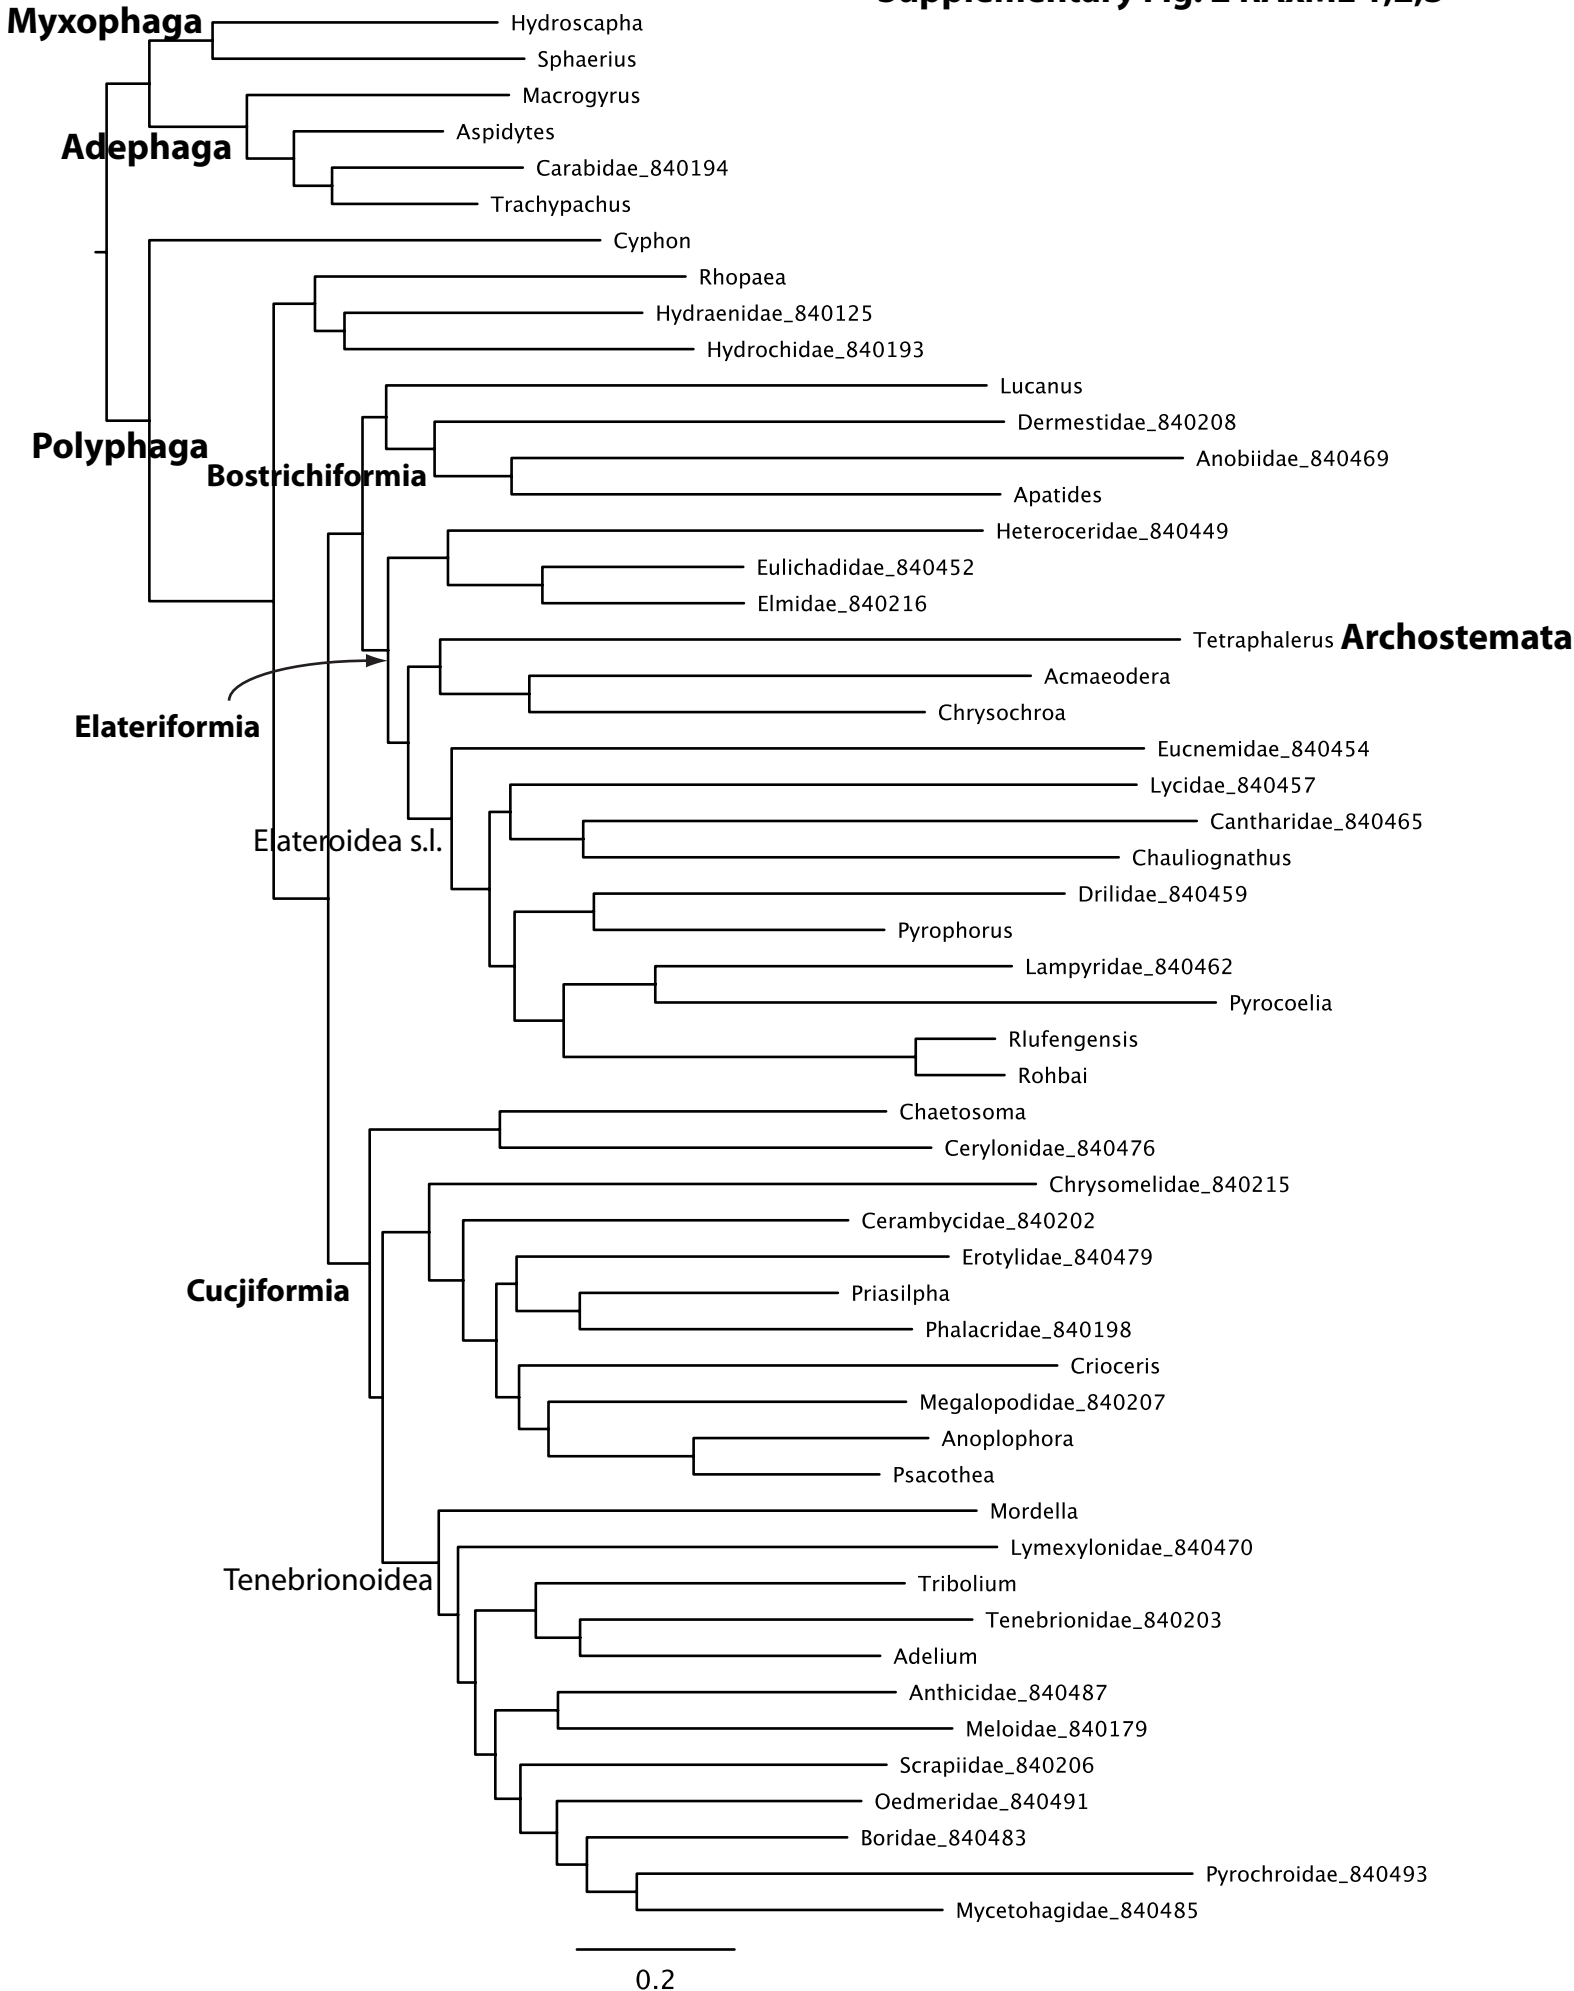

Supplementary Fig. 3 MrBayes 1, 2, 3

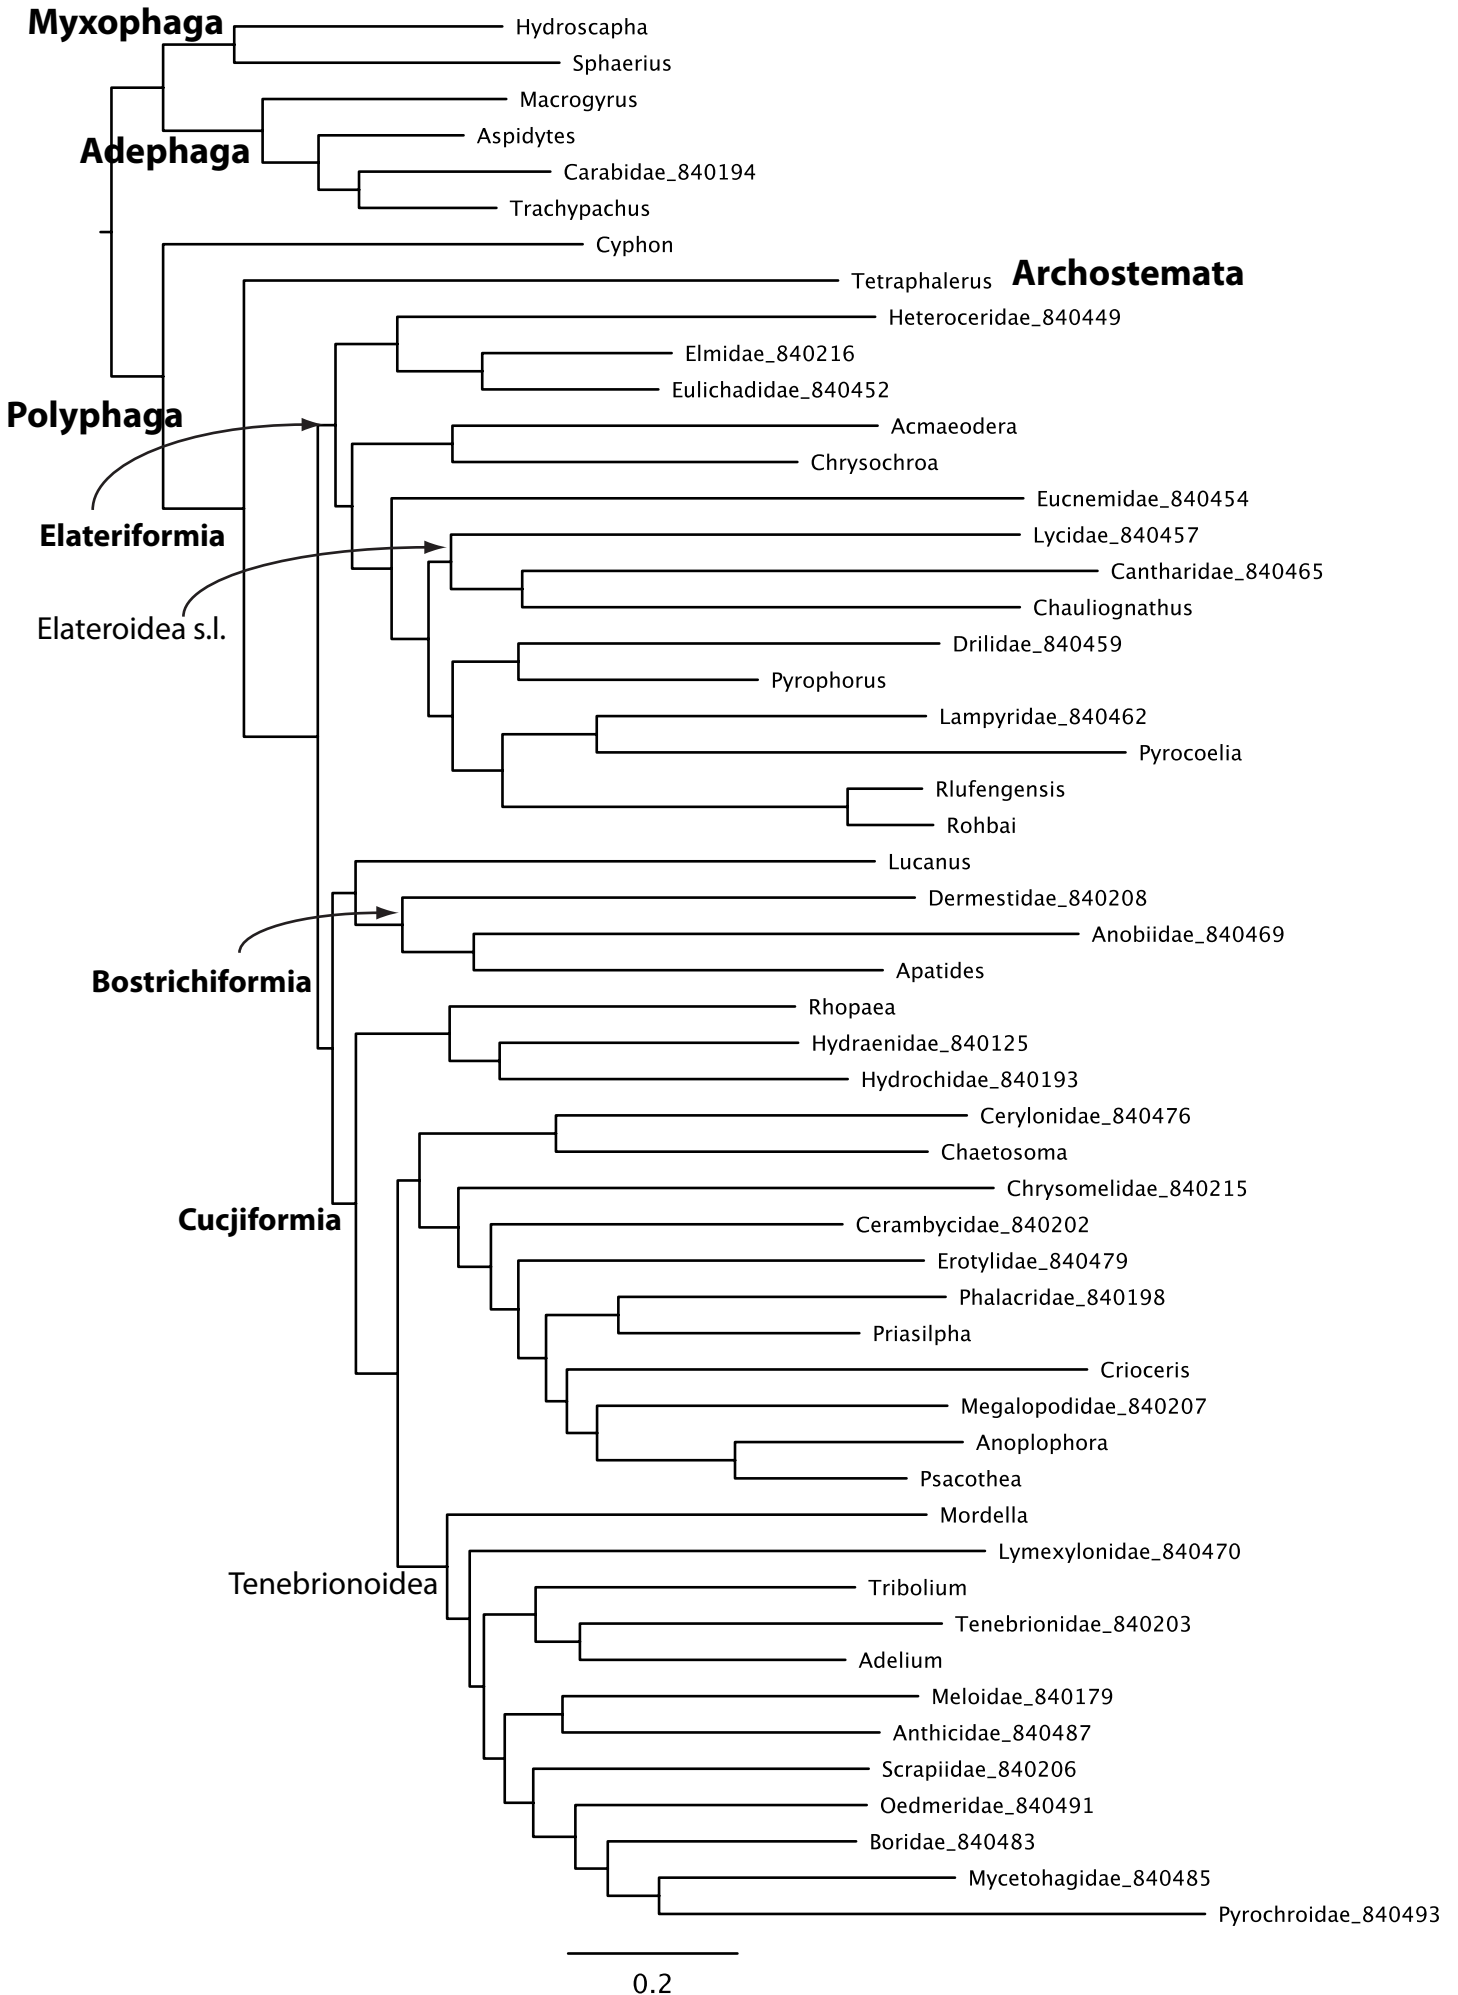

Supplementary Fig. 4 MrBayes 1RY, 2N

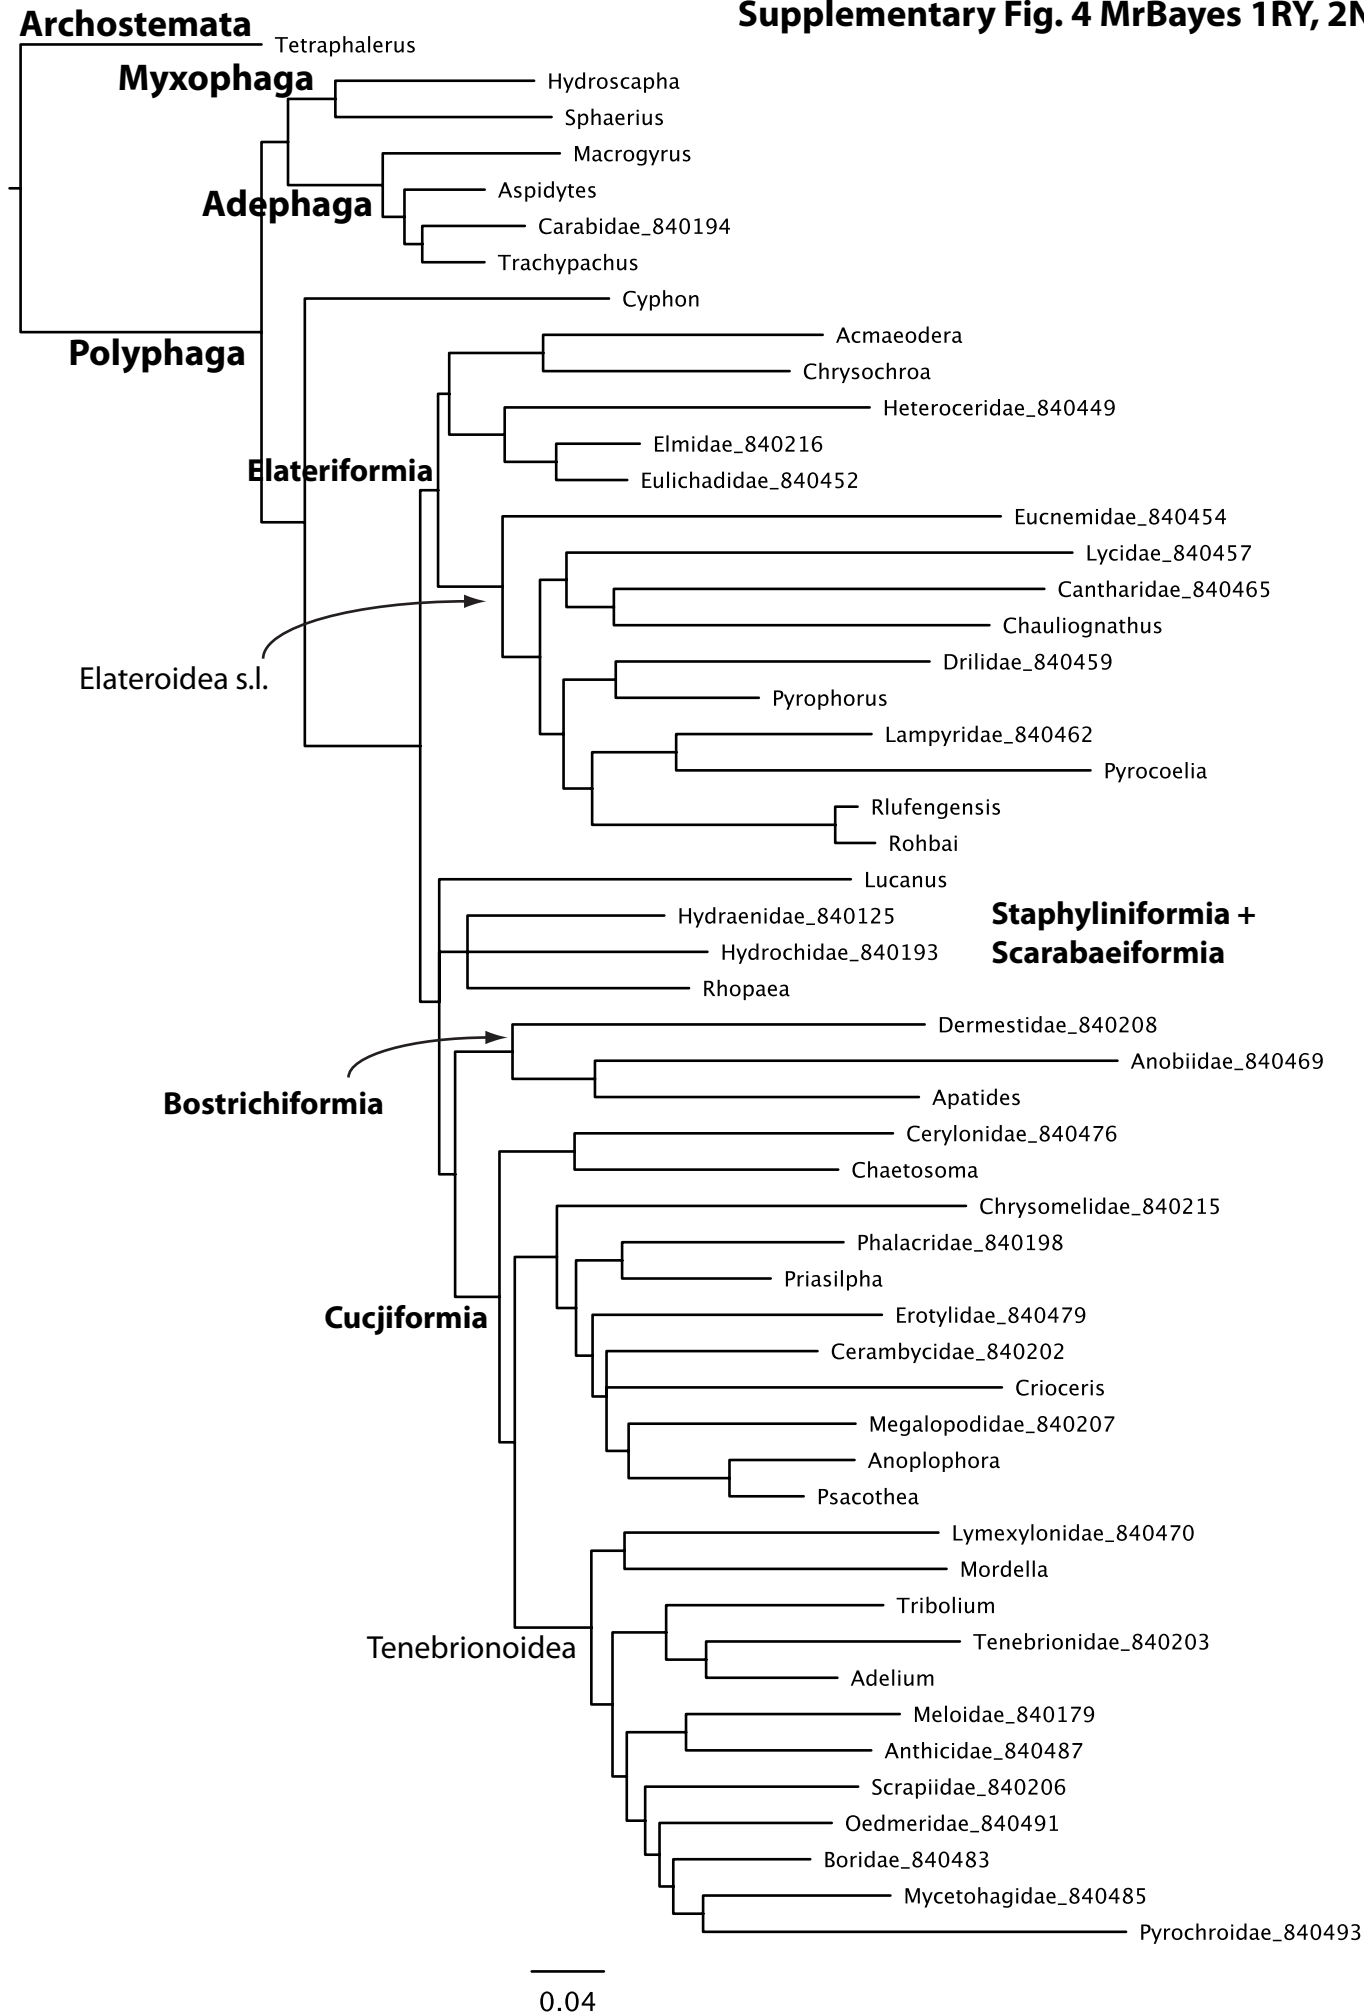



**Supplementary Fig. 5 Phylobase Nucl.**

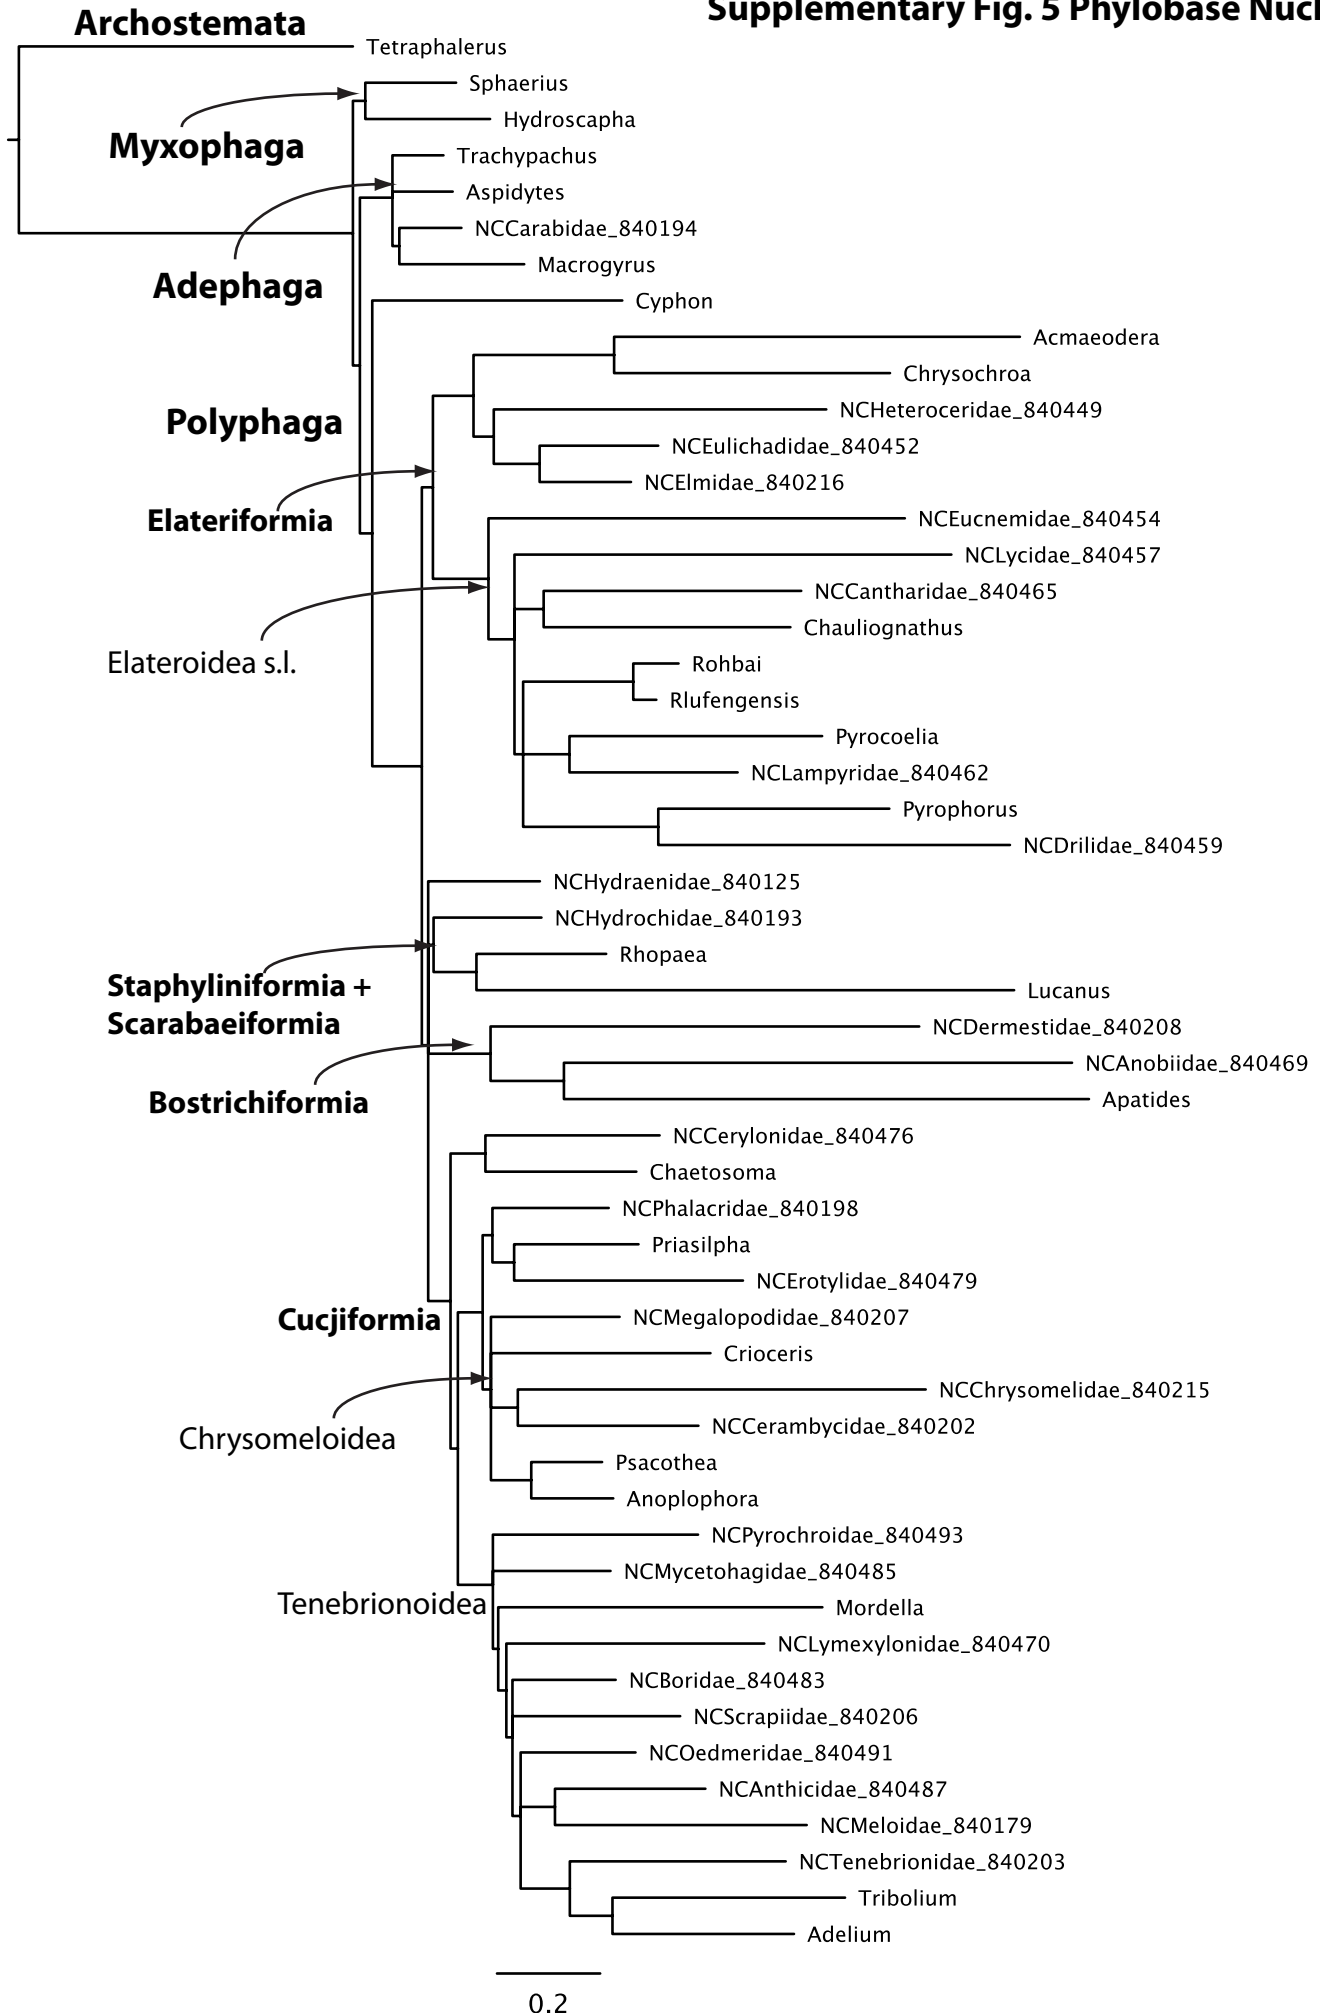

Supplement: supp_gkq807_MtGenomesSupplement.pdf [file supp_gkq807_MtGenomesSupplement.pdf]
